# Supplementary material for: Influence of redox treatments on the low-temperature water gas shift reaction over Pt/CeO2 catalysts
Source: Royal Society of Chemistry journal article supplement (doi:10.1039/d4cy00741g), 2024-01-01
Supplement: d4cy00741g1.pdf [file d4cy00741g1.pdf]

# **Influence of redox treatments on the low temperature water gas shift reaction over Pt/CeO<sub>2</sub> catalysts**

Clément Molinet-Chinaglia, Elizabeth Vera, Philippe Vernoux, Laurent Piccolo,  
Stéphane Loridant\*

*Université Claude Bernard-Lyon 1, CNRS, IRCELYON, UMR 5256, Villeurbanne, F-  
69100, France*

*\* Corresponding author.*

*E-mail address: [stephane.loridant@ircelyon.univ-lyon1.fr](mailto:stephane.loridant@ircelyon.univ-lyon1.fr)*

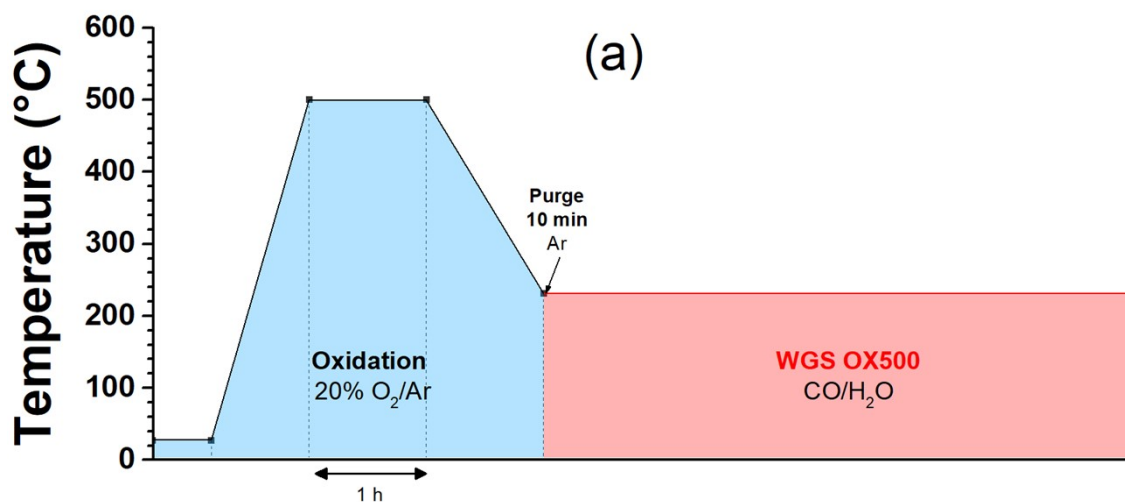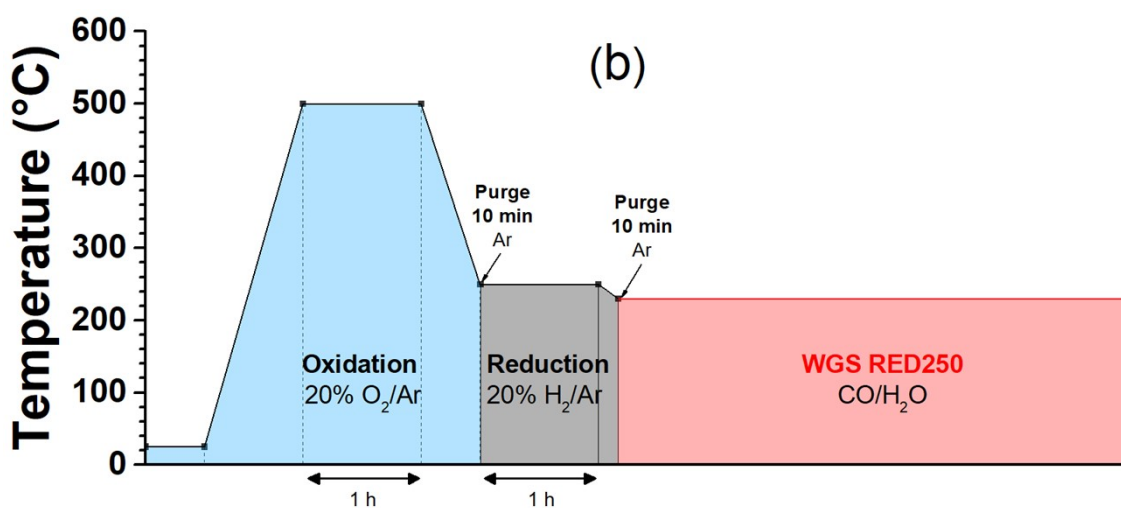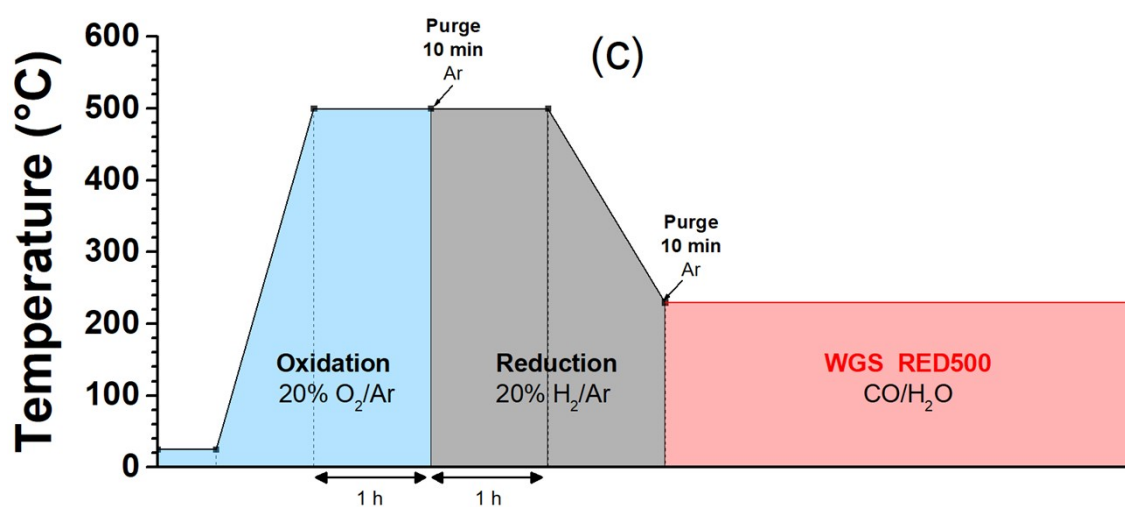

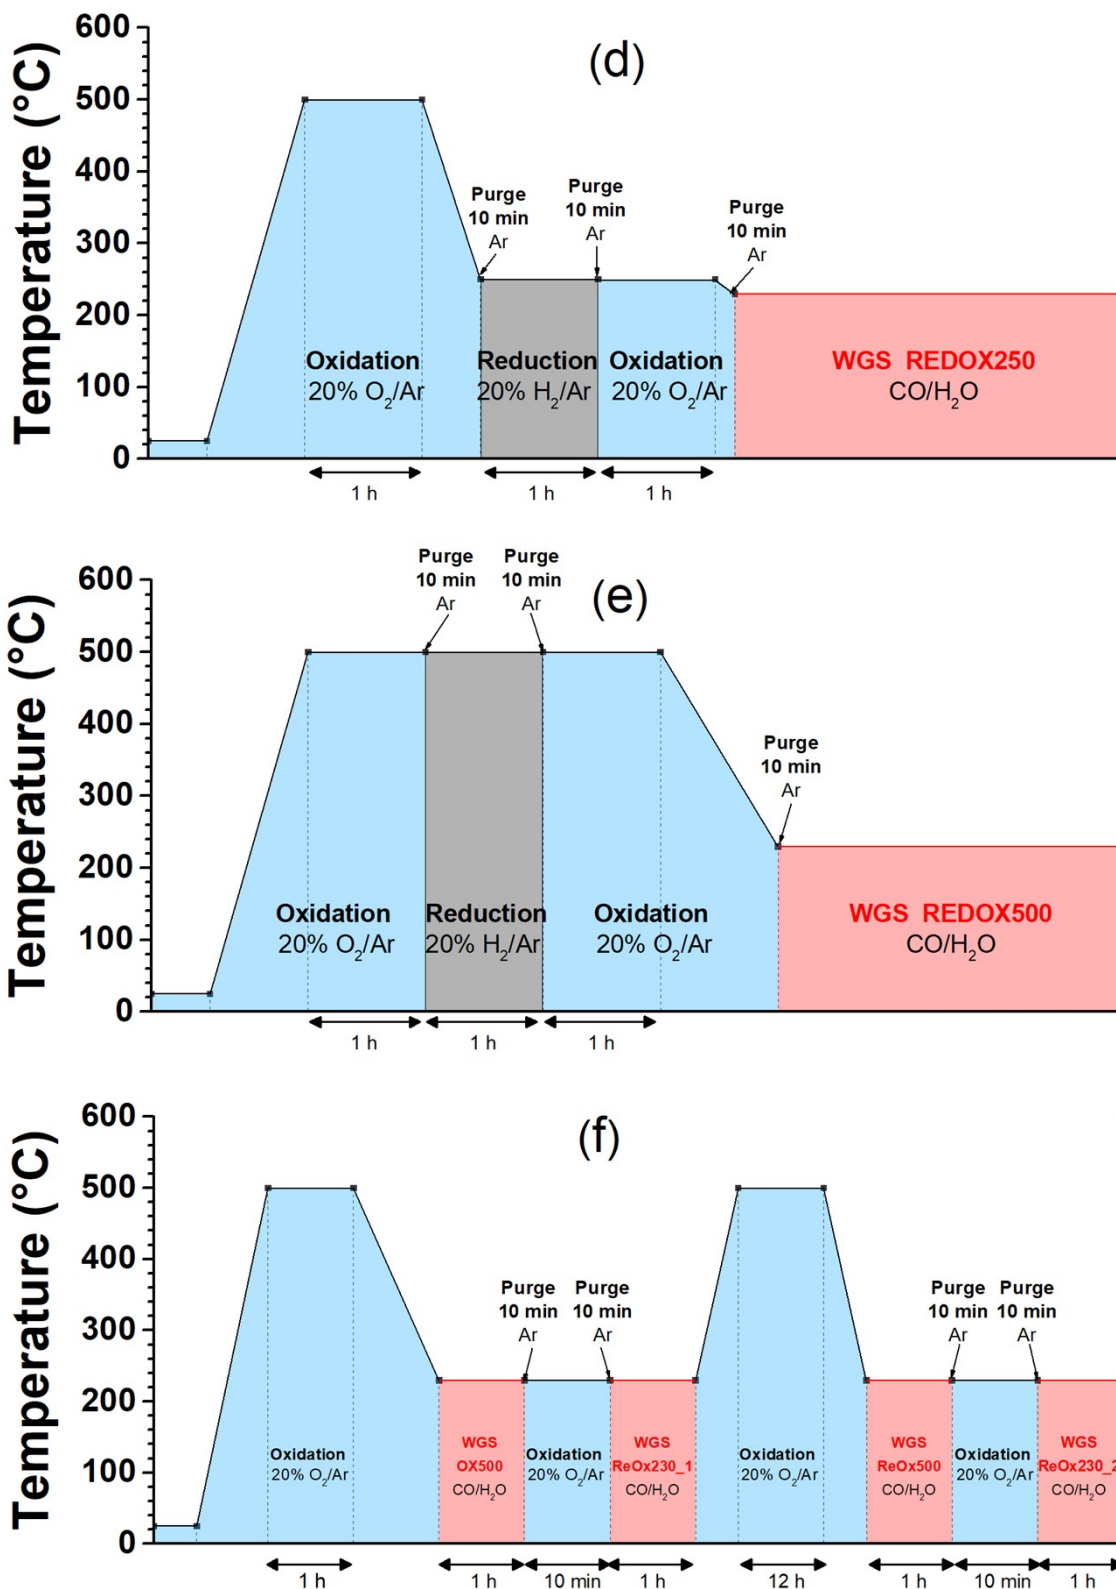

**Figure S1:** Scheme of the protocol used for (a) OX500, (b) RED250, (c) RED500, (d) REOX250, (e) REDOX500 pre-treatments followed by WGS reaction and (f) sequence of consecutive OX500, ReOx230\_1, ReOx500 and ReOx230\_2 oxidising post-treatments followed each time by WGS reaction.

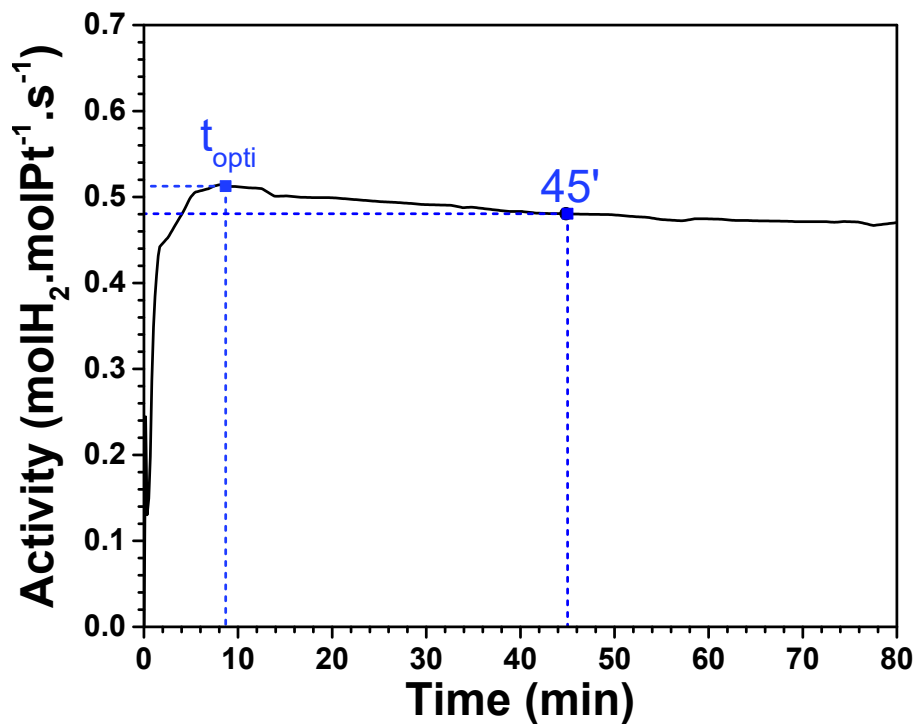

**Figure S2:** Evolution over time of molar activity of 0.59Pt catalyst after OX500 pre-treatment. It is maximal after minutes at  $t_{\text{opti}}$  time and then slowly decreases. The activity after 45 min on stream provides the deactivation rate.

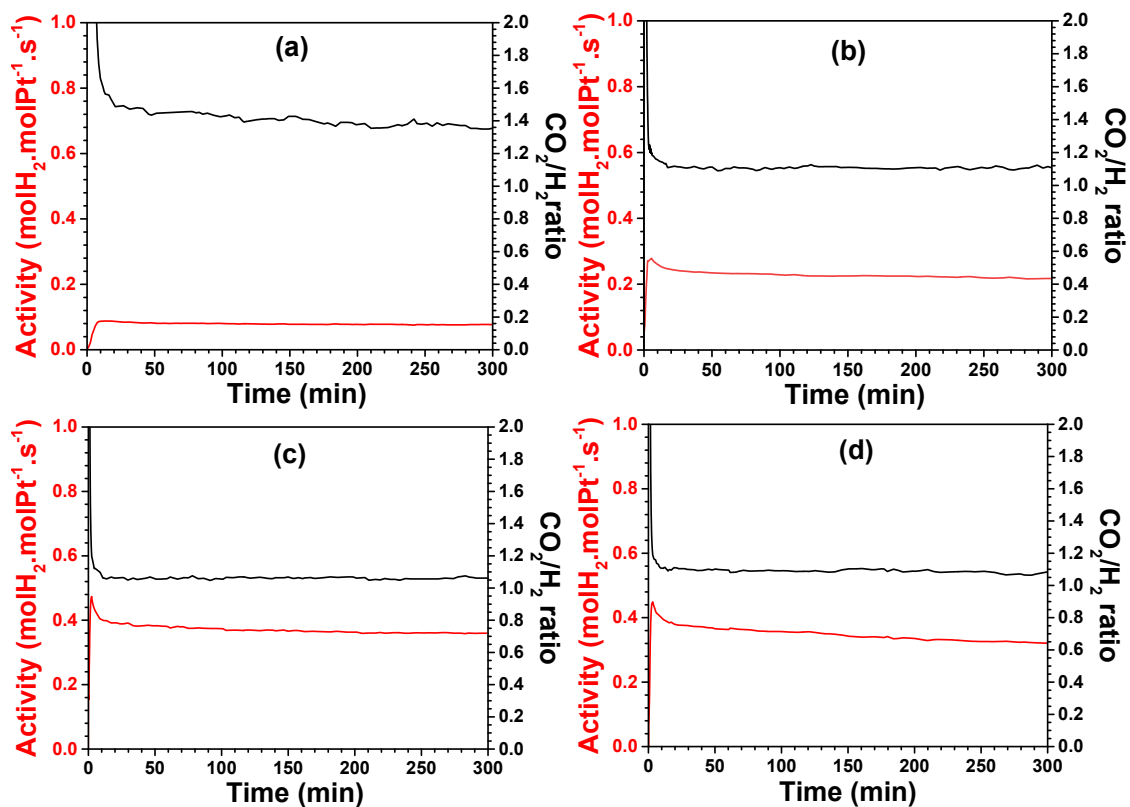

**Figure S3:** Evolution of molar activity and  $\text{CO}_2/\text{H}_2$  molar ratio with time on stream for 0.10Pt catalyst after (a) OX500, (b) RED250, (c) RED500 and (d) REDOX500 pretreatments. Reaction conditions: 230 °C,  $\text{H}_2\text{O}/\text{CO}/\text{Ar}/\text{He}$ :33.3/8.3/54.2/4.2 vol% feed,  $\text{GFSV} = 600 \text{ mL} \cdot \text{min}^{-1} \cdot \text{g}_{\text{cat}}^{-1}$ .

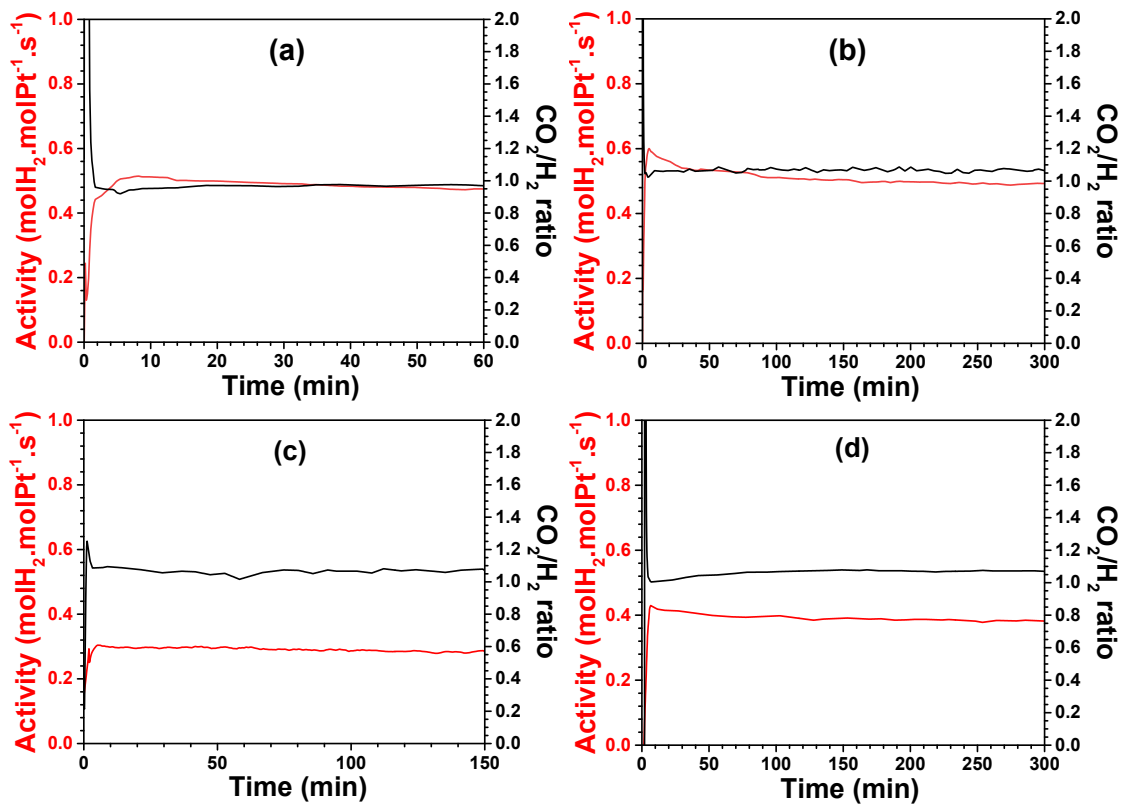

**Figure S4:** Evolution of molar activity and  $\text{CO}_2/\text{H}_2$  molar ratio with time on stream for 0.59Pt catalyst after (a) OX500, (b) RED250, (c) RED500 and (d) REDOX500 pretreatments. Reaction conditions: 230 °C,  $\text{H}_2\text{O}/\text{CO}/\text{Ar}/\text{He}$ :33.3/8.3/54.2/4.2 vol% feed,  $\text{GFSV} = 600 \text{ mL}\cdot\text{min}^{-1}\cdot\text{g}_{\text{cat}}^{-1}$ .

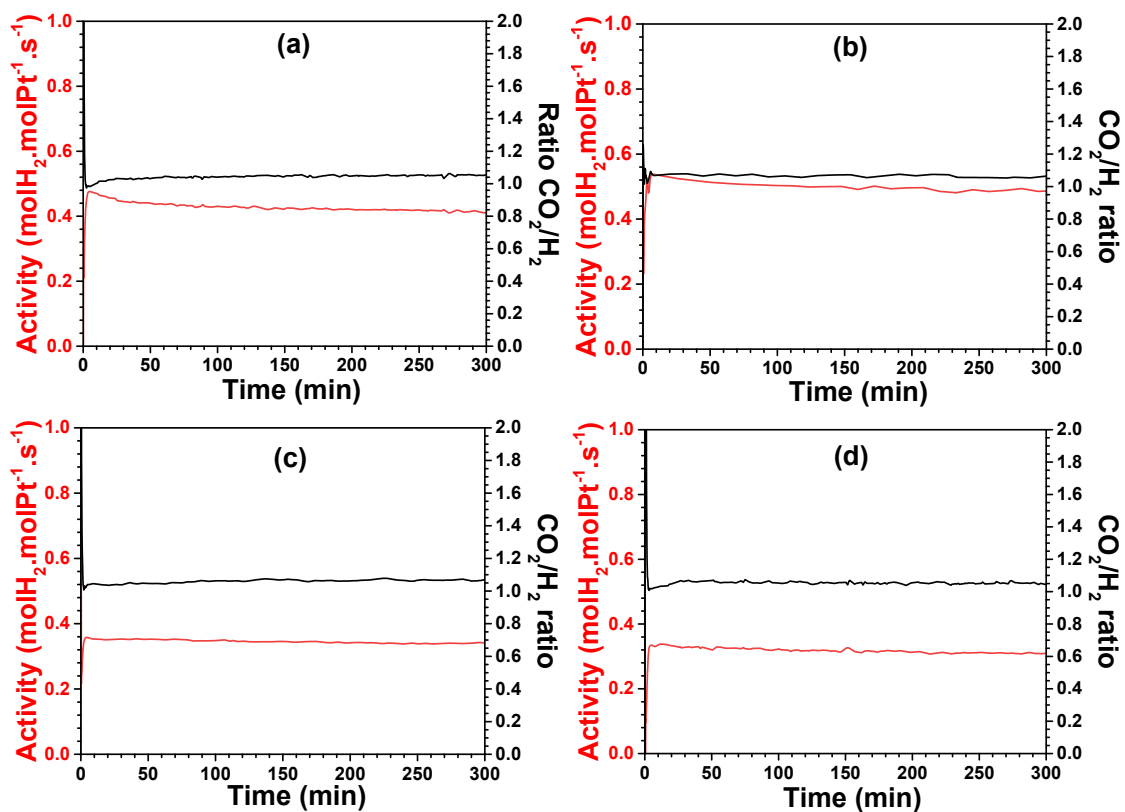

**Figure S5:** Evolution of molar activity and  $\text{CO}_2/\text{H}_2$  molar ratio with time on stream for 1.06Pt catalyst after (a) OX500, (b) RED250, (c) RED500 and (d) REDOX500 pretreatments. Reaction conditions: 230 °C,  $\text{H}_2\text{O}/\text{CO}/\text{Ar}/\text{He}$ :33.3/8.3/54.2/4.2 vol% feed,  $\text{GFSV} = 600 \text{ mL}\cdot\text{min}^{-1}\cdot\text{g}_{\text{cat}}^{-1}$ .

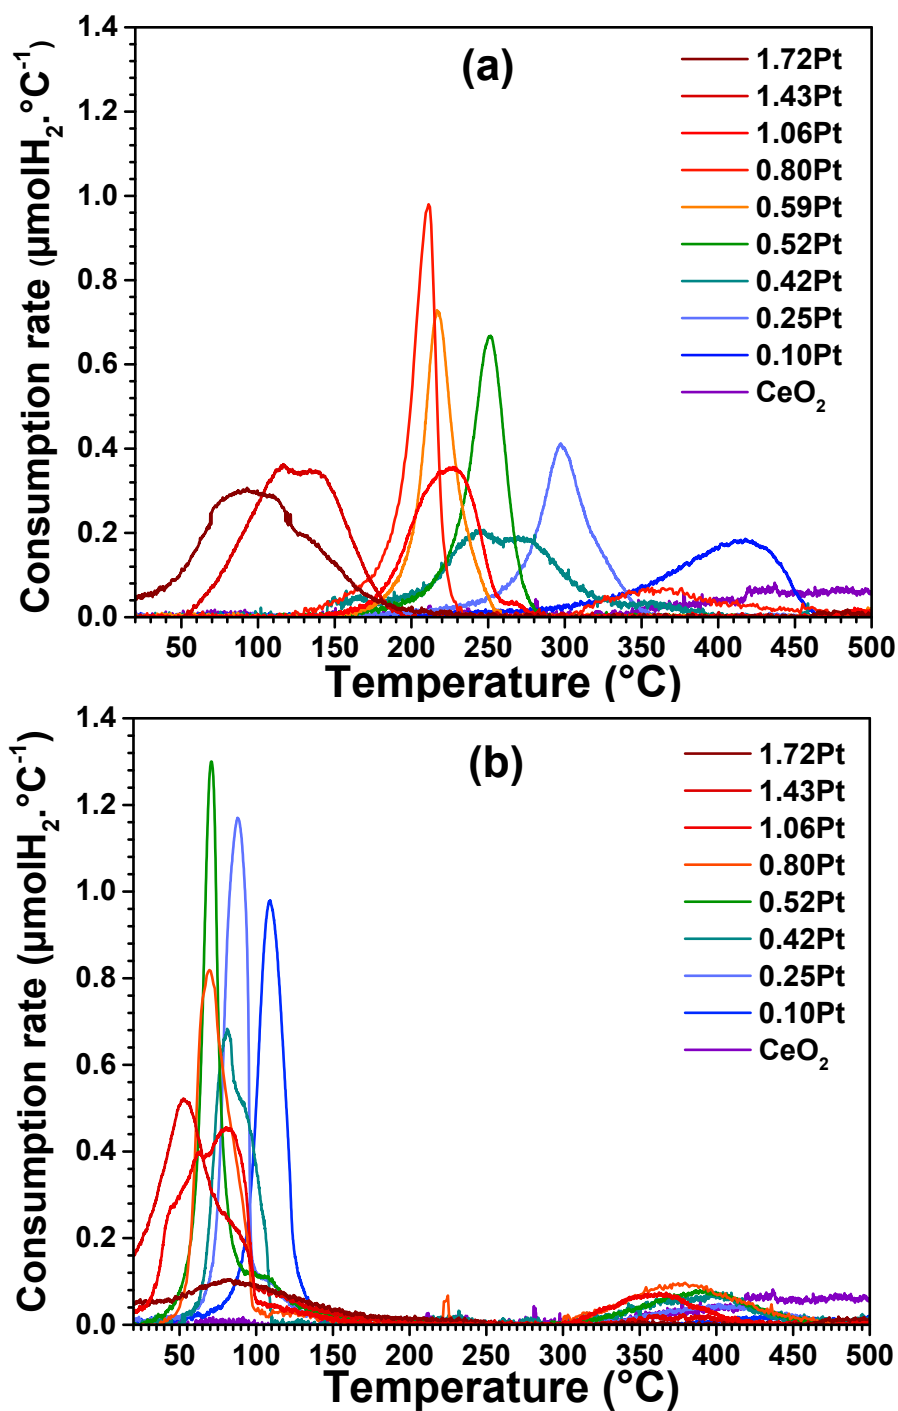

**Figure S6:** H<sub>2</sub>-TPR curves recorded for different Pt/CeO<sub>2</sub> catalysts (a) after OX500 pretreatment (TPR1) and (b) after TPR1 followed by 1 h of oxidative treatment at 500  $^\circ\text{C}$  which is similar to REDOX500 pretreatment (TPR2).



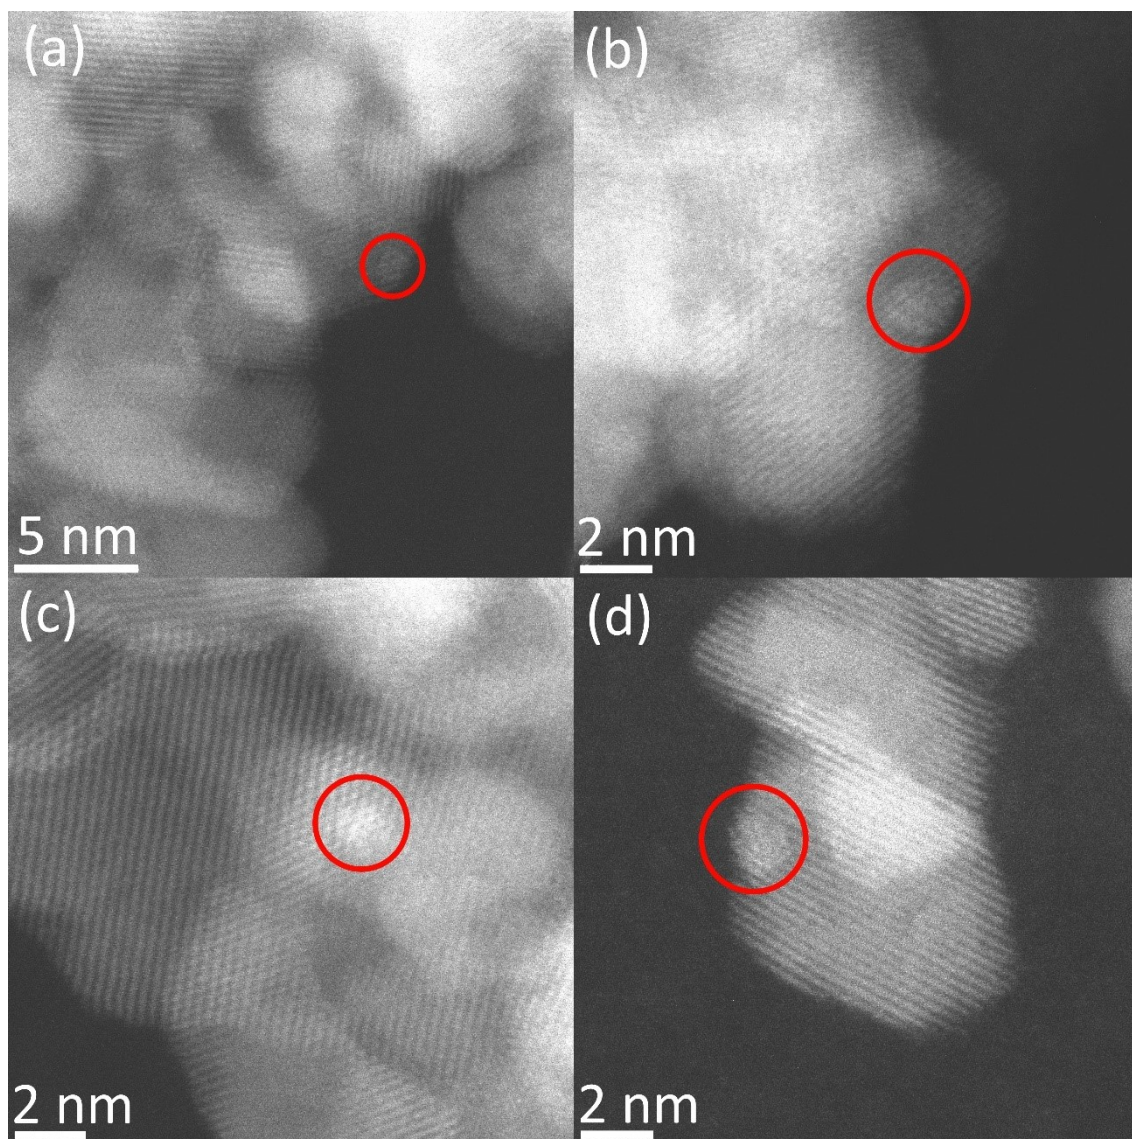

**Figure S7:** ADF-STEM images of 1.06Pt catalyst after RED500 pretreatment. The red circles indicate Pt NPs.

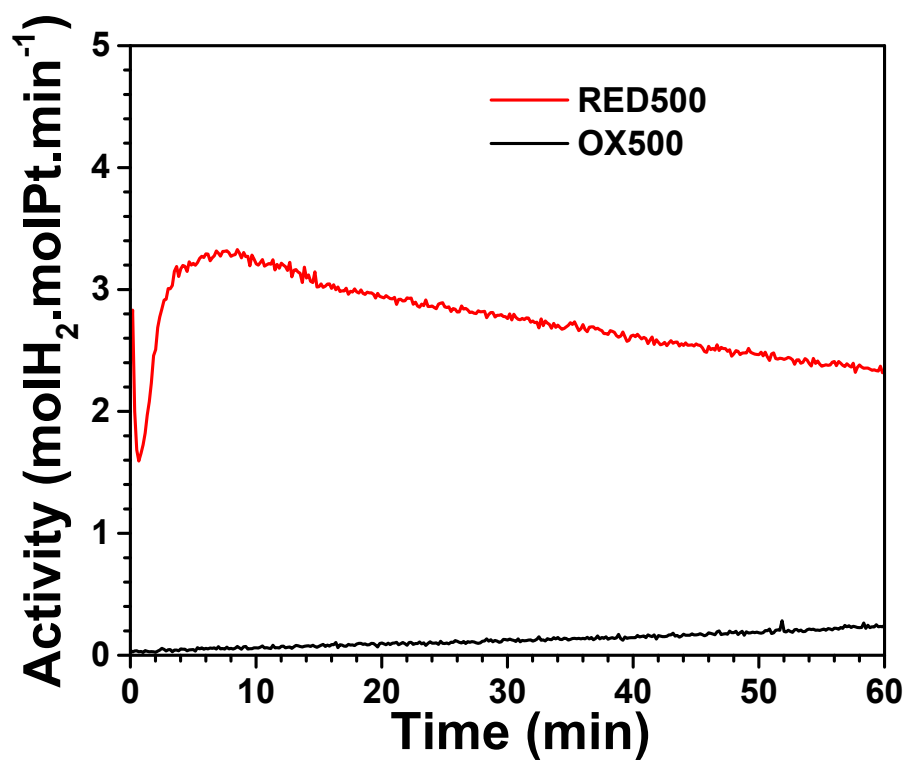

**Figure S8:** Evolution of molar activity during WGS reaction in the DRIFT cell for 0.10Pt catalyst after OX500 and RED500 pretreatments. Reaction conditions: T=230 °C, H<sub>2</sub>O/CO/He:2.0/0.5/97.5 vol% feed, GHSV =1000 mL.min<sup>-1</sup>.g<sup>-1</sup>.

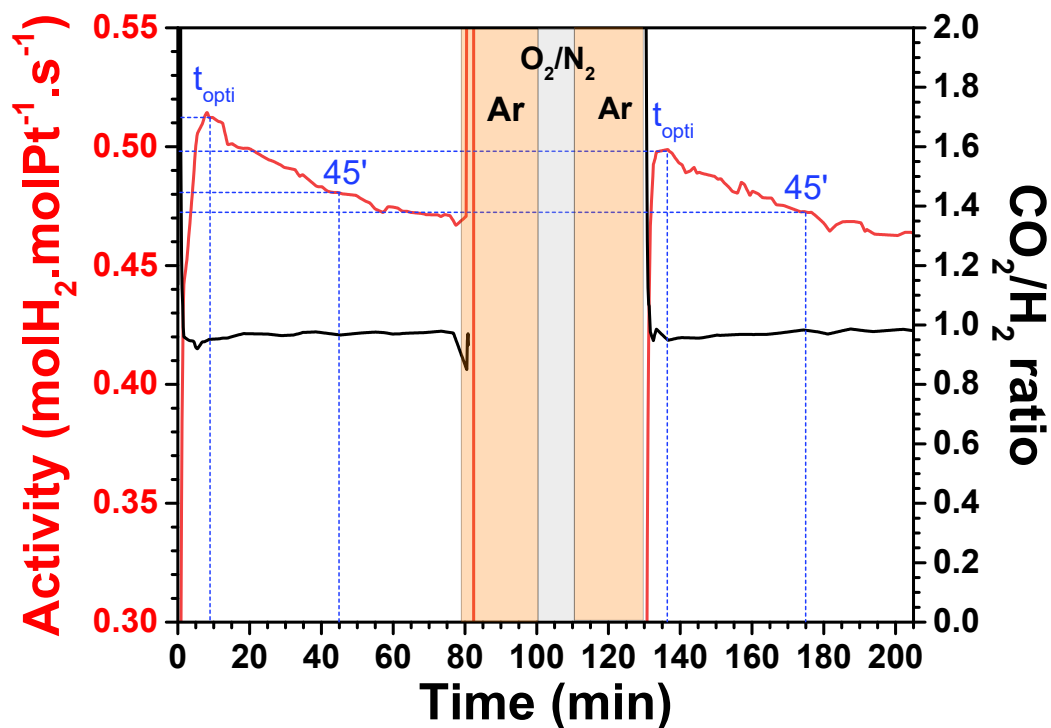

**Figure S9:** Evolution over time of molar activity and  $\text{CO}_2/\text{H}_2$  ratio of 0.59Pt catalyst after OX500 pre-treatment and after 10 min under 20% $\text{O}_2/\text{Ar}$  at 230 °C (ReOx230\_1 post-treatment). The  $t_{\text{opti}}$  time corresponds to the maximal activity for each WGS reaction. The activity after 45 min on stream provides the deactivation rate.

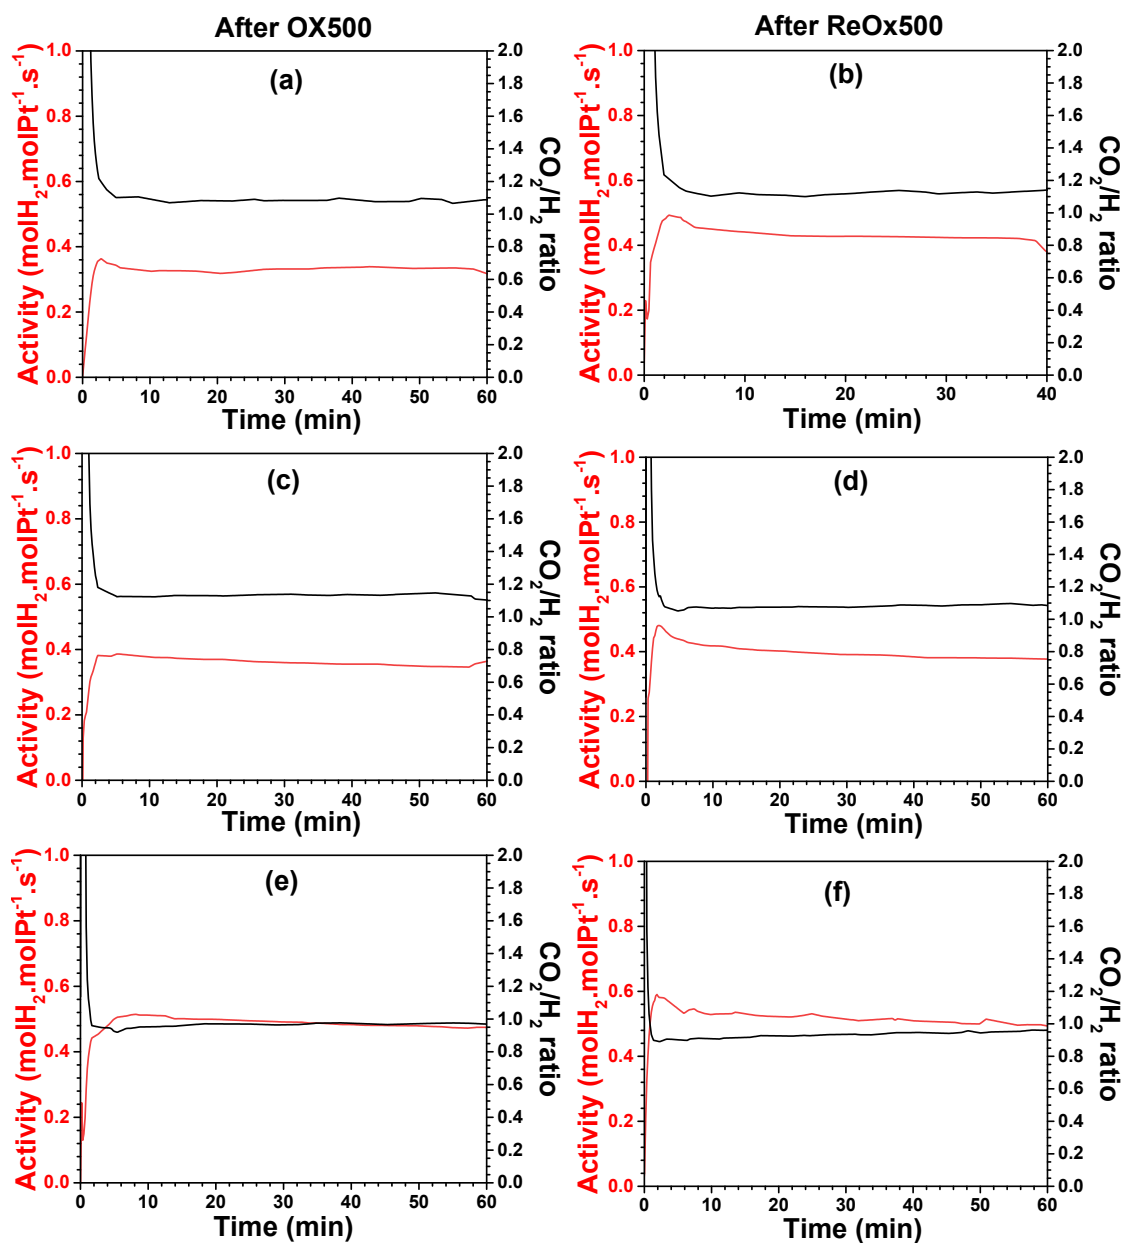

**Figure S10:** Evolution of molar activity and CO<sub>2</sub>/H<sub>2</sub> molar ratio with time on stream after OX500 pretreatment and ReOx500 post-treatment, respectively for (a,b) 0.25Pt, (c,d) 0.42Pt and (e,f) 0.59Pt catalysts. Reaction conditions: 230 °C, H<sub>2</sub>O/CO/Ar/He:33.3/8.3/54.2/4.2 vol% feed, GFSV = 600 mL.min<sup>-1</sup>.g<sub>cat</sub><sup>-1</sup>.

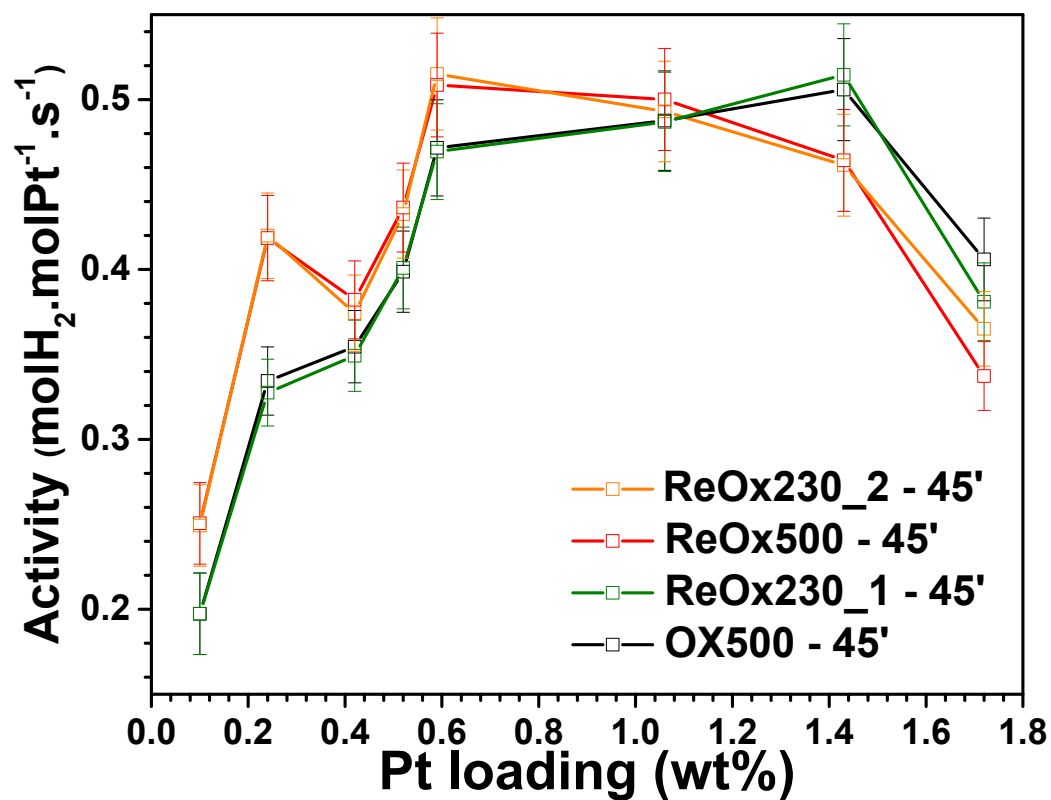

Figure S11: Evolution with Pt loading of molar activity at 45 min on stream after OX500 pretreatment and after ReOx230\_1, ReOx500 and ReOx230\_2 post-treatments.

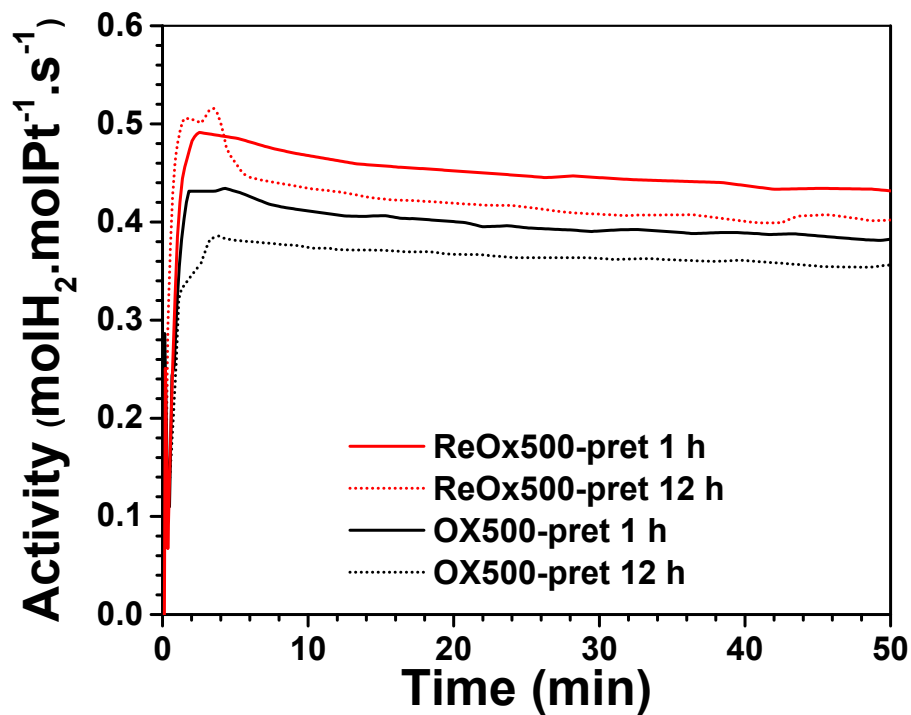

**Figure S12:** Evolution of molar activity with time on stream for 0.52Pt catalyst after 1 h or 12 h oxidative pretreatment at 500 °C (OX500-pret 1 h and OX500-pret 12 h) and after a first testing and oxidative post-treatment at 500 °C for 12 h (ReOx500-pret 1 h and ReOx500-pret-12 h). Reaction conditions: 230 °C, H<sub>2</sub>O/CO/Ar/He:33.3/8.3/54.2/4.2 vol% feed, GFSV = 600 mL.min<sup>-1</sup>.g<sub>cat</sub><sup>-1</sup>.

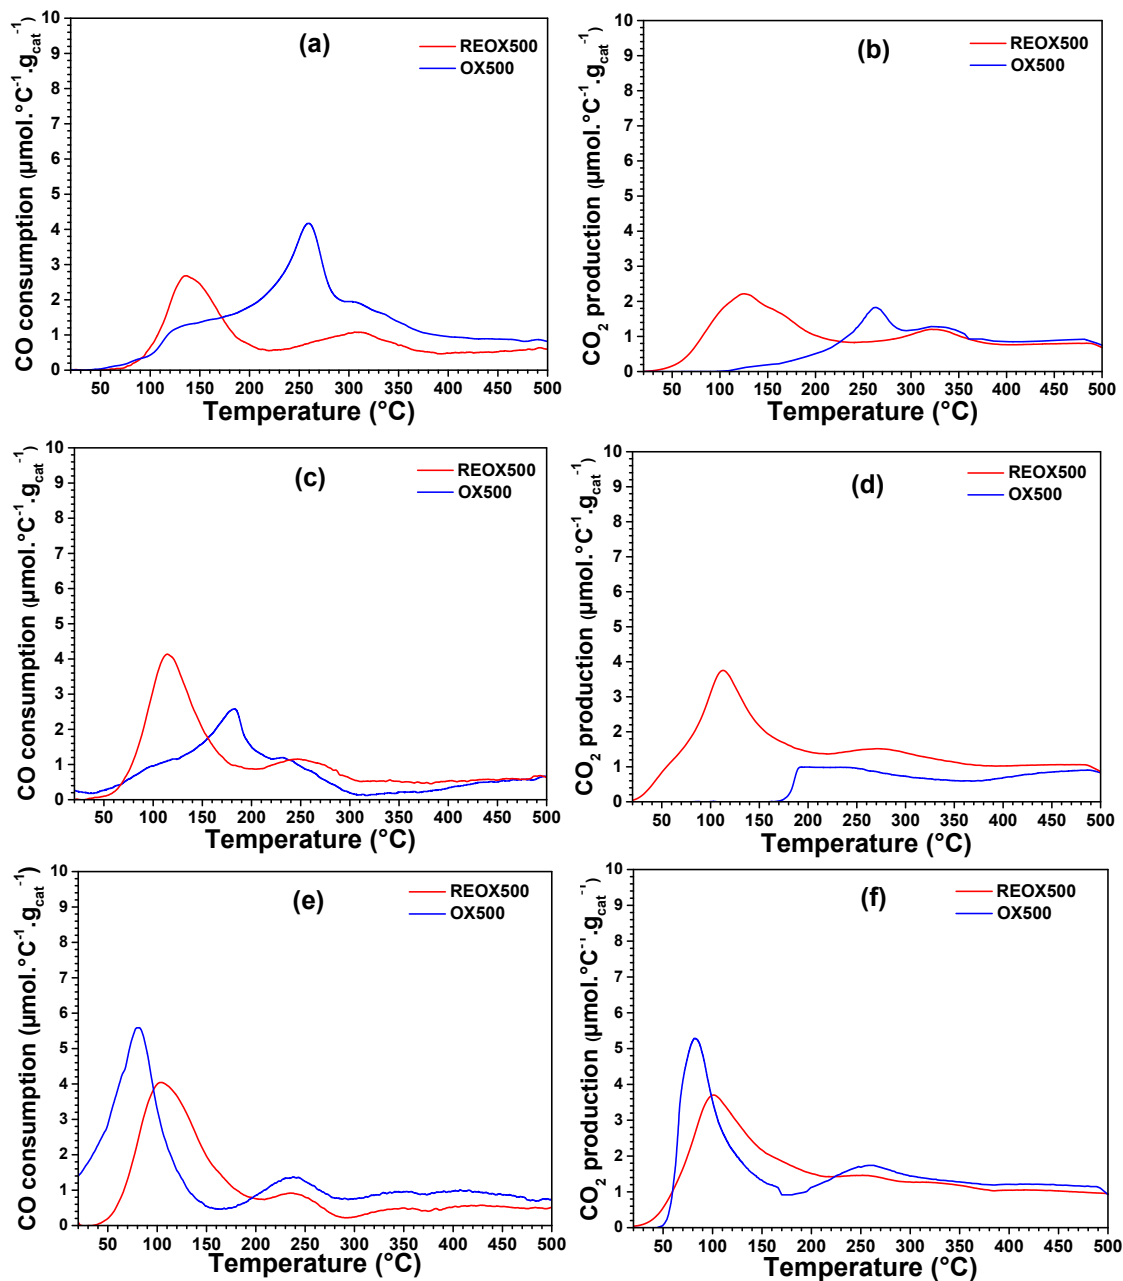

**Figure S13:** Evolution of CO consumption and  $\text{CO}_2$  production with temperature during CO-TPR analysis under 1%CO/He after OX500 pretreatment and after 120 min of WGS reaction followed by ReOx500 post-treatment for (a,b) 0.10Pt, (c,d) 0.52Pt and (e,f) 1.43Pt catalysts.

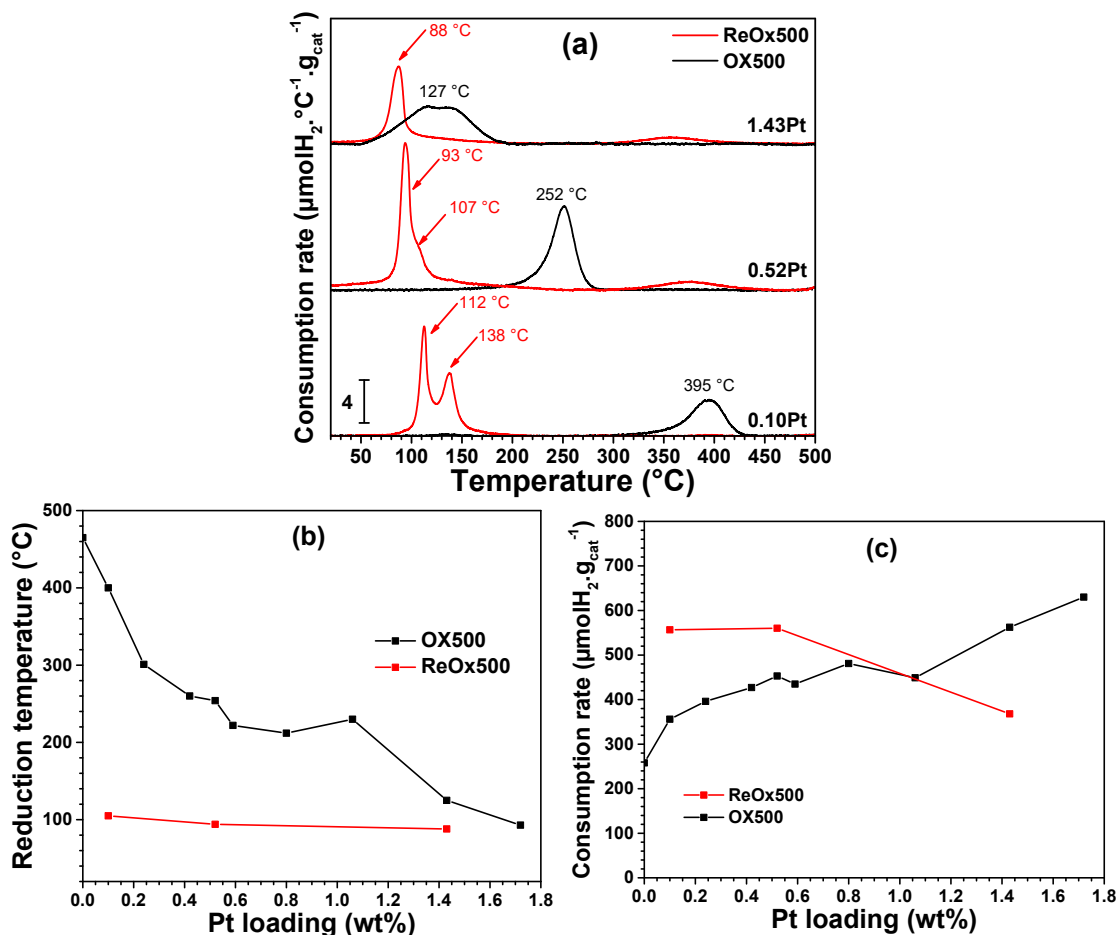

**Figure S14:** (a) H<sub>2</sub>-TPR curves of 0.10Pt, 0.52Pt and 1.43Pt catalysts, (b) evolution of reduction temperature and (c) evolution of H<sub>2</sub> consumption rate with Pt loading after OX500 pretreatment and ReOx500 post-treatment.

H<sub>2</sub>-TPR analysis after OX500 pretreatment and after ReOx500 post-treatment were compared: for 0.10Pt, 0.52Pt and 1.43Pt catalysts, the reduction temperature (temperature at the peak maximum) decreases after ReOx500 post-treatment especially for the LPC catalysts (Figure S12a and b). The values reached are close to that 1.43Pt catalyst after OX500 pretreatment. Furthermore, H<sub>2</sub> consumption is observed at room temperature for the three catalysts (Table S4). The H<sub>2</sub> consumption rate was compared after OX500 and ReOx500 (Figure S12c). As shown by the much lower consumption rates required for the reduction of PtO to Pt<sup>0</sup> than the determined values (Table S4), it corresponds mostly to surface reduction of CeO<sub>2</sub>. This parameter was significantly higher for 0.10Pt and 0.52Pt catalysts after ReOx500 while it was lower for the 1.43Pt catalyst. The increase in reducibility of CeO<sub>2</sub> suggests a higher reducibility of PtO<sub>x</sub> species than after OX500 leading to the formation of Pt<sup>0</sup> NPs capable of dissociating H<sub>2</sub>. Thus, the PtO<sub>x</sub> species formed upon reoxidation of Pt<sup>0</sup> NPs from WGS reaction are different from those present



after the OX500 pretreatment. Despite the redispersion observed by STEM-ADF analysis, the ReOx500 post-treatment does not lead to the regeneration of PtO<sub>x</sub> species strongly anchored to CeO<sub>2</sub> surface and poorly reducible, thus confirming the irreversibility of the structural modifications of Pt species.

For LPC catalysts, ReOx500 post-treatment increases the H-spillover on CeO<sub>2</sub> surface. Thus, it seems to increase the number of Pt<sup>0</sup> NPs. However, CeO<sub>2</sub> sintering (decrease in surface area) could occur for HPC catalysts during WGS reaction and/or TPR measurement after ReOx500 leading to a lower reduction rate.

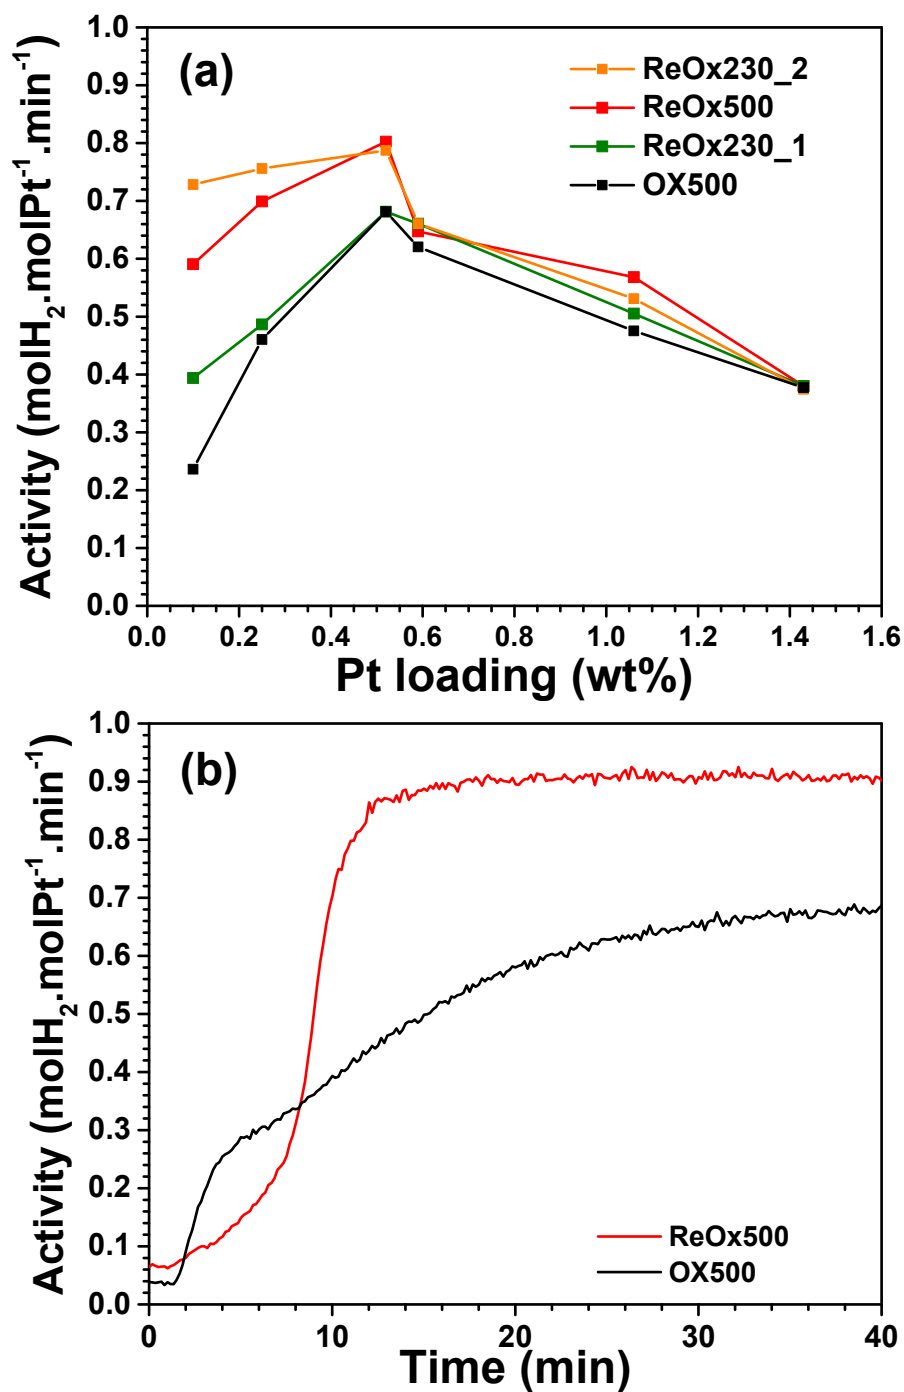

**Figure S15:** (a) Evolution with Pt loading of molar activity at steady state after OX500 pretreatment, after ReOx230\_1, ReOx500 and ReOx230\_2 post-treatments in the DRIFTS cell and (b) evolution of molar activity with time on stream for 0.52Pt catalyst after OX500 pretreatment and ReOx500 post-treatment. Reaction conditions: 230 °C, H<sub>2</sub>O/CO/Ar/He:33.3/8.3/54.2/4.2 vol% feed, GFSV = 600 mL.min<sup>-1</sup>.g<sub>cat</sub><sup>-1</sup>.

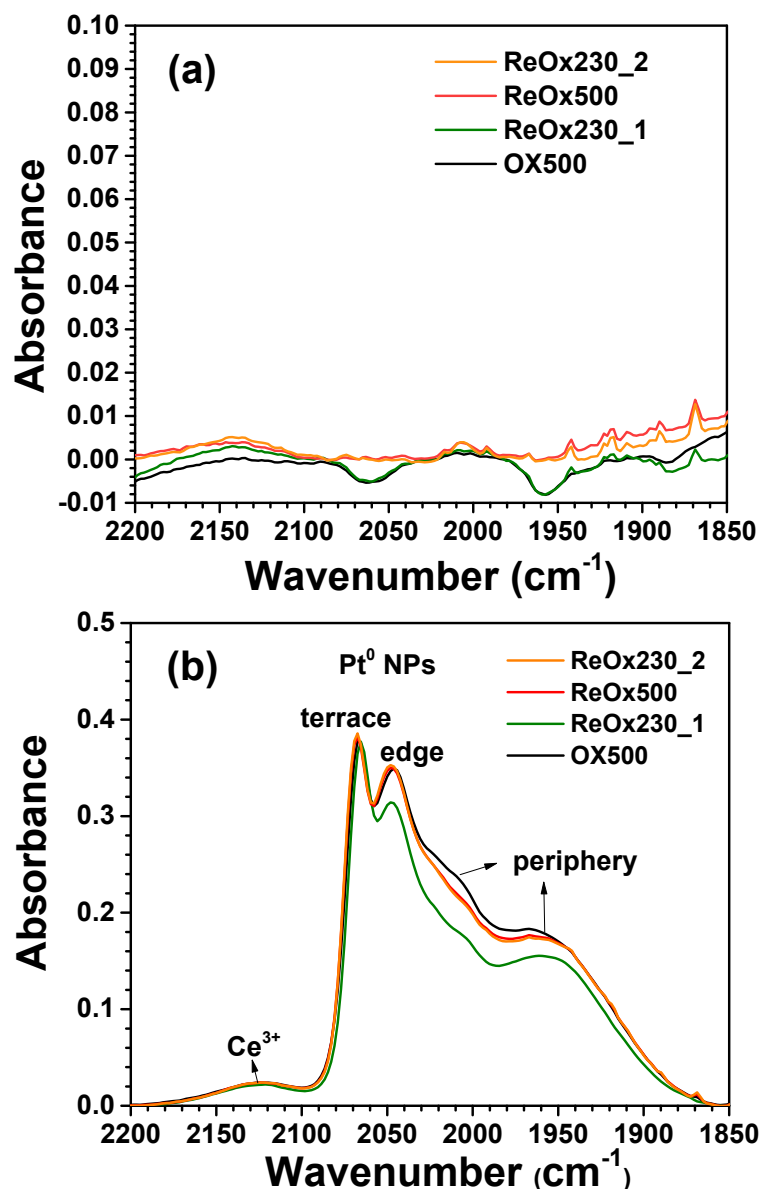

**Figure S16:** *operando* DRIFTS spectra between 2200 and 1850 cm<sup>-1</sup> of (a) 0.10Pt and (b) 1.43Pt catalysts recorded after OX500 pretreatment, ReOx230\_1, ReOx500 and ReOx230\_2 post-treatments. Reaction conditions: T=230 °C, P<sub>CO</sub> = 5 mbar, P<sub>H2O</sub> = 20 mbar, GHSV =1000 mL.min<sup>-1</sup>.g<sup>-1</sup>. The background corresponds to the spectrum of KBr powder recorded at 230 °C and the ν(CO)<sub>gas</sub> signal is subtracted.

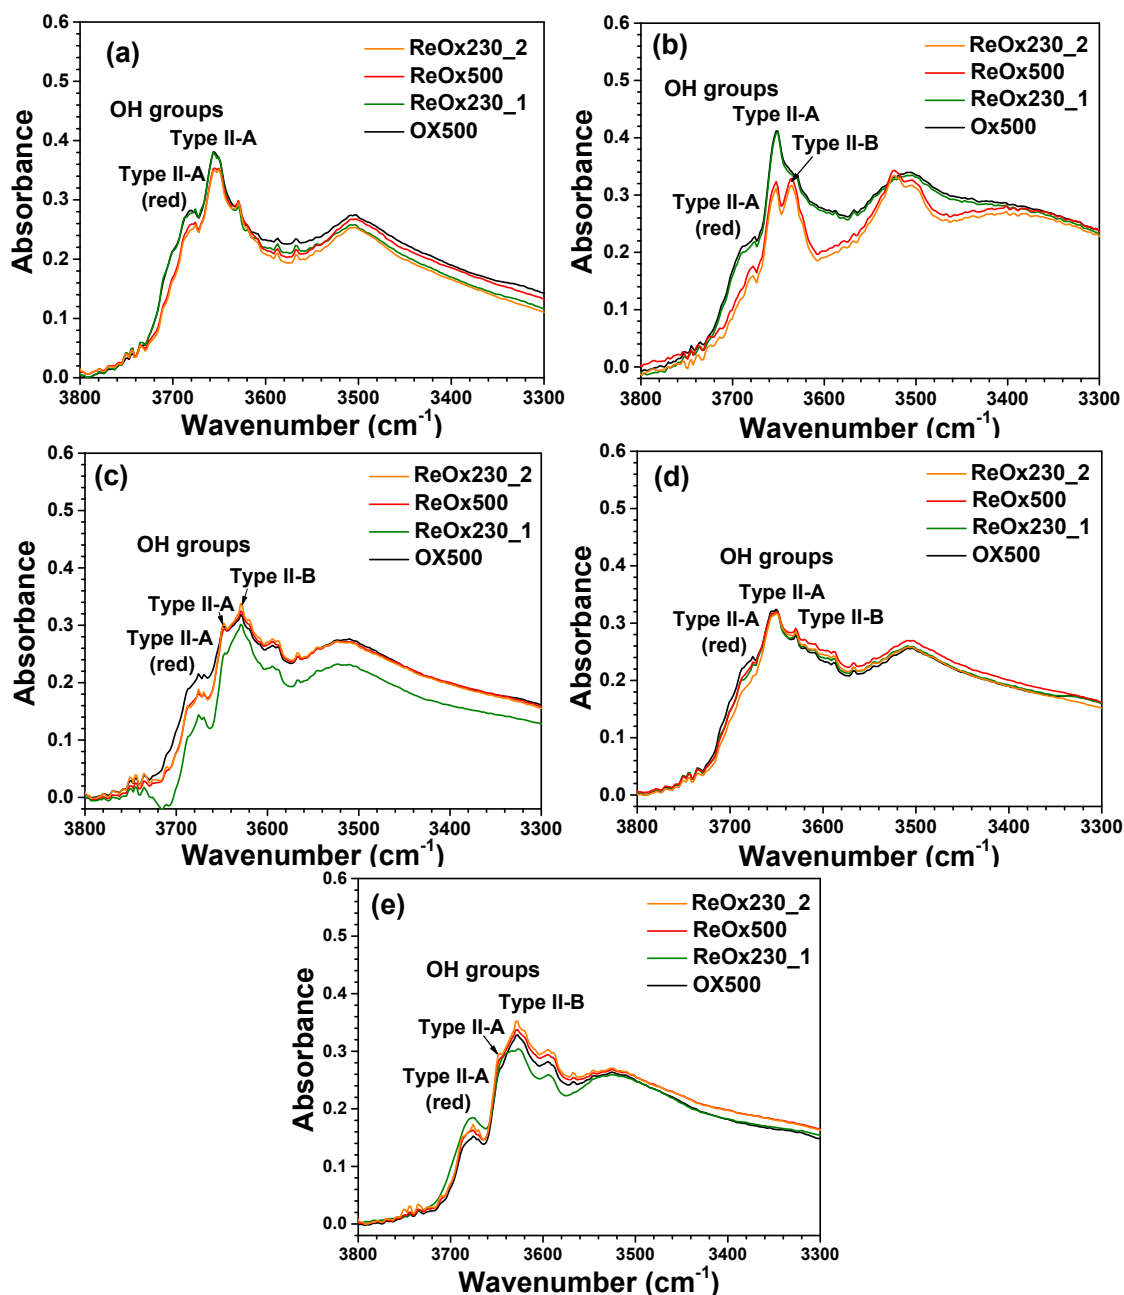

**Figure S17:** *operando* DRIFTS spectra between 3800 and 3100 cm<sup>-1</sup> of (a) 0.10Pt, (b) 0.25Pt, (c) 0.52Pt, (d) 1.06Pt and (e) 1.43Pt catalysts recorded after OX500 pretreatment, ReOx230\_1, ReOx500 and ReOx230\_2 post-treatments. Reaction conditions: T=230 °C, P<sub>CO</sub> = 5 mbar, P<sub>H<sub>2</sub>O</sub> = 20 mbar, GHSV = 1000 mL.min<sup>-1</sup>.g<sup>-1</sup>. The background corresponds to the spectrum of KBr powder recorded at 230 °C.

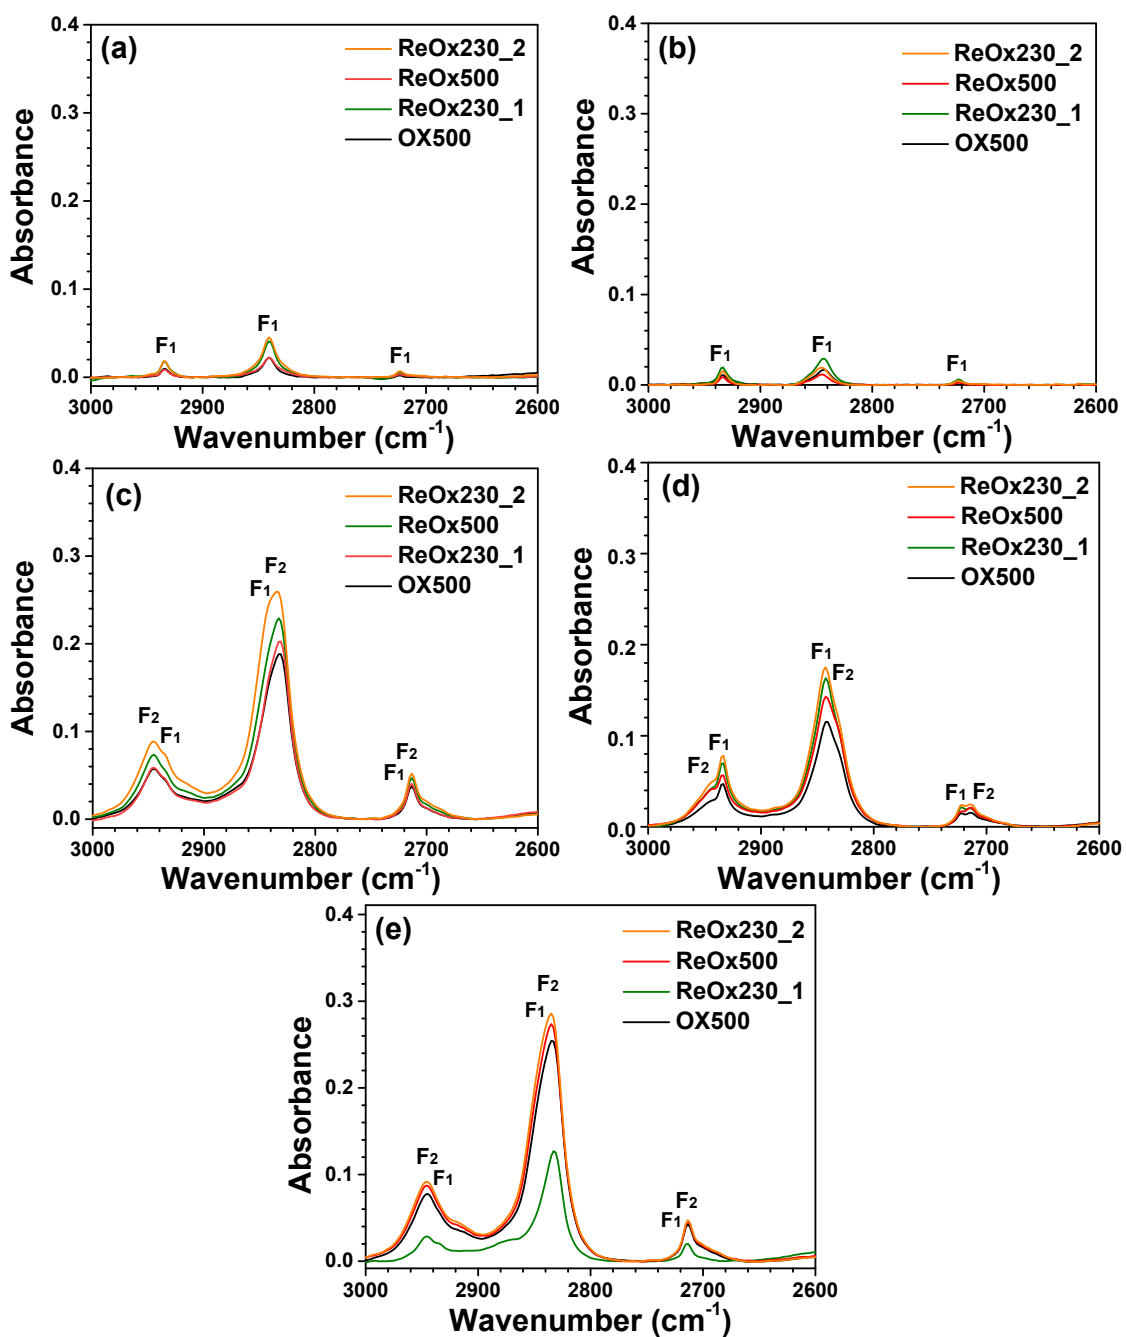

**Figure S18:** *operando* DRIFTS spectra between 3000 and 2600  $\text{cm}^{-1}$  of (a) 0.10Pt, (b) 0.25Pt, (c) 0.52Pt, (d) 1.06Pt and (e) 1.43Pt catalysts recorded after OX500 pretreatment, ReOx230\_1, ReOx500 and ReOx230\_2 post-treatments. Reaction conditions:  $T=230\text{ }^{\circ}\text{C}$ ,  $P_{\text{CO}} = 5\text{ mbar}$ ,  $P_{\text{H}_2\text{O}} = 20\text{ mbar}$ ,  $\text{GHSV} = 1000\text{ mL}\cdot\text{min}^{-1}\cdot\text{g}^{-1}$ . The background corresponds to the spectrum of KBr powder recorded at  $230\text{ }^{\circ}\text{C}$ . F1 and F2: bridged formates.

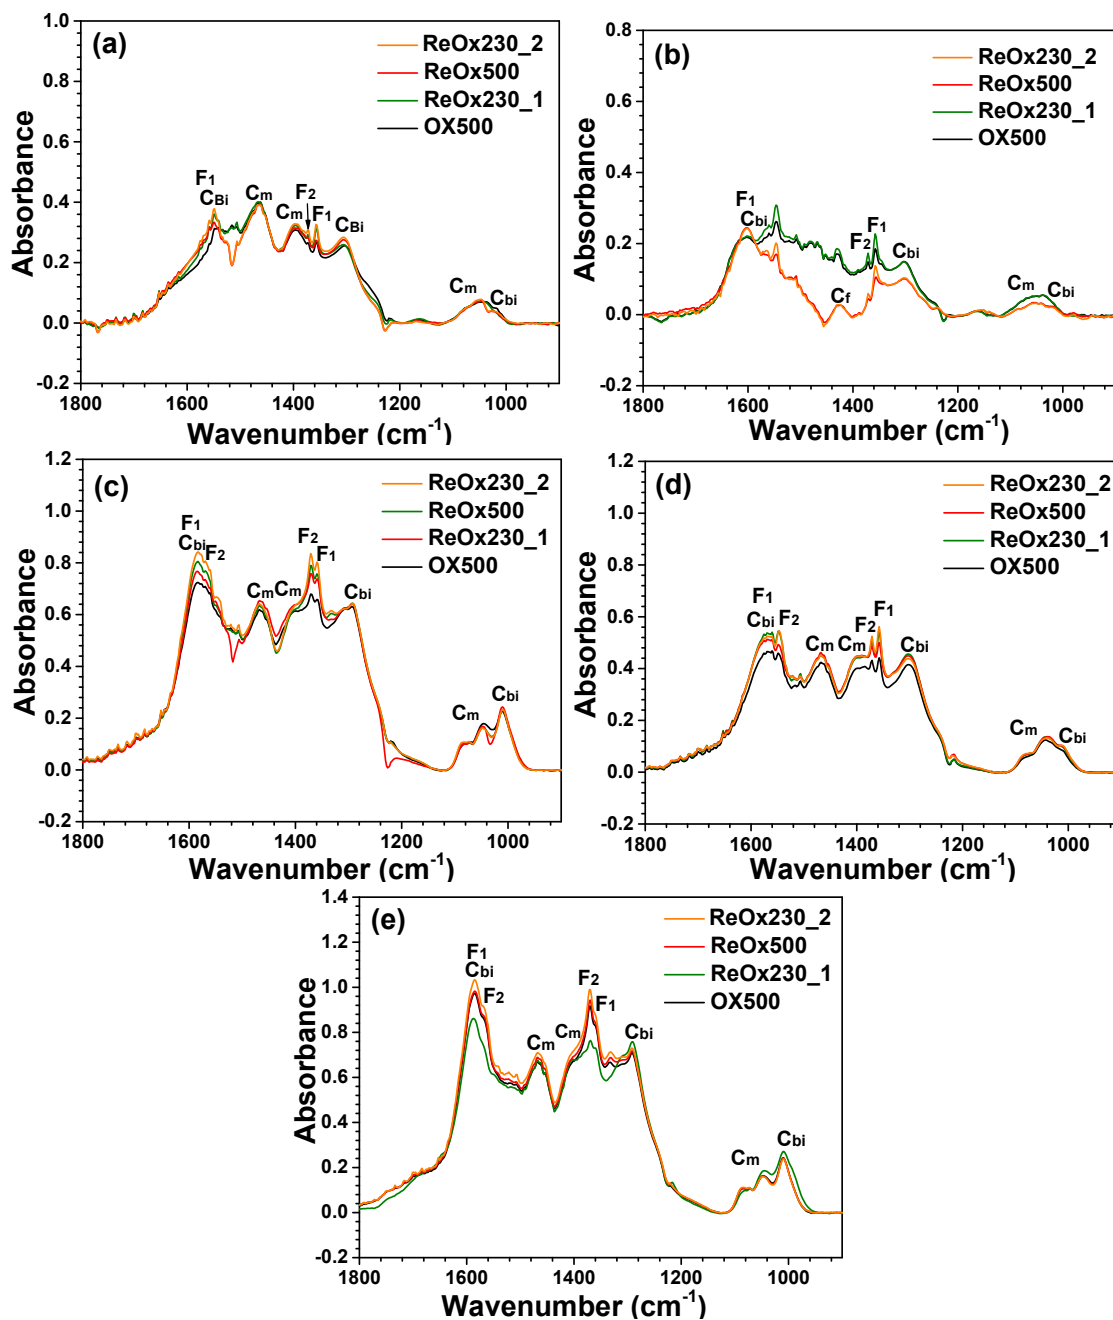

**Figure S19:** *operando* DRIFTS spectra between 1800 and 800  $\text{cm}^{-1}$  of (a) 0.10Pt, (b) 0.25Pt, (c) 0.52Pt (d) 1.06Pt and (e) 1.43Pt catalysts recorded after OX500 pretreatment, ReOx230\_1, ReOx500 and ReOx230\_2 post-treatments. Reaction conditions:  $T=230\text{ }^{\circ}\text{C}$ ,  $P_{\text{CO}} = 5\text{ mbar}$ ,  $P_{\text{H}_2\text{O}} = 20\text{ mbar}$ ,  $\text{GHSV} = 1000\text{ mL}\cdot\text{min}^{-1}\cdot\text{g}^{-1}$ . The background corresponds to the spectrum of KBr powder recorded at  $230\text{ }^{\circ}\text{C}$ . Cbi: bidentate carbonate, Cm: monodentate carbonate, F1 and F2: bridged formates.

**Table S1:** H<sub>2</sub> consumption rate during H<sub>2</sub>-TPR analysis determined between RT and 500 °C and theoretical H<sub>2</sub> consumption to reduce PtO into Pt<sup>0</sup>.

| Catalyst         | H <sub>2</sub> consumption rate (μmolH <sub>2</sub> .g <sub>cat</sub> <sup>-1</sup> ) |            |                                                          |
|------------------|---------------------------------------------------------------------------------------|------------|----------------------------------------------------------|
|                  | TPR1                                                                                  | TPR2       | PtO +H <sub>2</sub> → Pt <sup>0</sup> + H <sub>2</sub> O |
| CeO <sub>2</sub> | 258                                                                                   | 258        | 0                                                        |
| 0.10Pt           | 357                                                                                   | <b>491</b> | 5                                                        |
| 0.25Pt           | 396                                                                                   | <b>485</b> | 13                                                       |
| 0.42Pt           | 427                                                                                   | 400        | 22                                                       |
| 0.52Pt           | 455                                                                                   | 457        | 27                                                       |
| 0.80Pt           | 480                                                                                   | 463        | 41                                                       |
| 1.06Pt           | 449                                                                                   | 446        | 54                                                       |
| 1.43Pt           | 562                                                                                   | 600        | 73                                                       |
| 1.72Pt           | 631                                                                                   | 670        | 88                                                       |

**Table S2:** Relative deviations of molar activity measured during WGS reaction at 230 °C after OX500, RED250, RED500, REDOX500 pretreatments. They are calculated from

| Catalyst | Relative deviation of molar activity (%) |        |          |        |          |
|----------|------------------------------------------|--------|----------|--------|----------|
|          | OX500                                    | RED250 | REDOX250 | RED500 | REDOX500 |
| 0.10Pt   | 7                                        | 16     | 20       | 19     | 18       |
| 0.59Pt   | 7                                        | 11     | 8        | 2      | 6        |
| 1.06Pt   | 6                                        | 4      | 5        | 2      | 4        |

the maximal activities at  $t_{opti}$  and the activities at 45 min as follows:

$$\frac{a(t_{opti}) - a(45')}{a(t_{opti})}$$



**Table S3:** Relative deviations (%) of molar activity measured during WGS reaction at 230 °C after ReOx230\_1, ReOx500 and ReOx230 post-treatments in comparison with activity after OX500 pretreatment. They are calculated from the maximal activities at  $t_{opti}$  and the activities at 45 min as follows:

$$\frac{a_{OX500}(t_{opti}) - a_{OX500}(45')}{a_{OX500}(t_{opti})}, \frac{a_{ReOx230}(t_{opti}) - a_{OX500}(t_{opti})}{a_{OX500}(t_{opti})} \text{ and } \frac{a_{ReOx230}(45') - a_{OX500}(45')}{a_{OX500}(45')}$$

$$\frac{a_{ReOx500}(t_{opti}) - a_{OX500}(t_{opti})}{a_{OX500}(t_{opti})} \text{ and } \frac{a_{ReOx500}(45') - a_{OX500}(45')}{a_{OX500}(45')}$$

| Catalyst | Relative deviation of the molar activity (%) |            |           |            |           |            |           |            |
|----------|----------------------------------------------|------------|-----------|------------|-----------|------------|-----------|------------|
|          | OX500                                        |            | ReOx230_1 |            | ReOx500   |            | ReOx230_2 |            |
|          | 45'                                          | $t_{opti}$ | 45'       | $t_{opti}$ | 45'       | $t_{opti}$ | 45'       | $t_{opti}$ |
| 0.10Pt   | -6                                           | 0          | 0         | <b>41</b>  | <b>27</b> | <b>38</b>  | <b>26</b> |            |
| 0.25Pt   | -11                                          | -1         | -2        | <b>31</b>  | <b>25</b> | <b>28</b>  | <b>26</b> |            |
| 0.42Pt   | -7                                           | 0          | -2        | <b>25</b>  | <b>8</b>  | <b>13</b>  | <b>6</b>  |            |
| 0.52Pt   | -10                                          | -3         | 1         | <b>29</b>  | <b>9</b>  | <b>7</b>   | <b>9</b>  |            |
| 0.59Pt   | -5                                           | -3         | 0         | <b>18</b>  | <b>8</b>  | <b>9</b>   | <b>9</b>  |            |
| 1.06Pt   | -8                                           | -3         | 0         | 1          | 3         | 3          | 1         |            |
| 1.43Pt   | -6                                           | -5         | -1        | -7         | -6        | -8         | -8        |            |
| 1.72Pt   | -4                                           | -6         | -6        | -13        | -17       | -19        | -19       |            |

**Table S4:** H<sub>2</sub> consumption rates at room temperature (RT) and total values determined between RT and 500 °C during H<sub>2</sub>-TPR analysis. They are calculated from the integration of the consumption rate.

| Catalyst | Consumption rate ( $\mu\text{molH}_2\cdot\text{g}_{\text{cat}}^{-1}$ ) |       |         |       |         |
|----------|------------------------------------------------------------------------|-------|---------|-------|---------|
|          | PtO +H <sub>2</sub> →<br>Pt <sup>0</sup> + H <sub>2</sub> O            | RT    |         | Total |         |
|          |                                                                        | OX500 | ReOx500 | OX500 | ReOx500 |
| 0.10Pt   | 5                                                                      | <1    | 46      | 357   | 510     |
| 0.52Pt   | 27                                                                     | <1    | 3       | 455   | 560     |
| 1.43Pt   | 73                                                                     | 6     | 7       | 562   | 367     |
